# Supplementary material for: Specific catalytically impaired DDX3X mutants form sexually dimorphic hollow condensates
Source: PubMed Central journal article supplement — Nat Commun. 2024 Nov 5;15:9553. doi: 10.1038/s41467-024-53636-0 (PMC11538506; doi:10.1038/s41467-024-53636-0), 2024-11-05
Supplement: 41467_2024_53636_MOESM3_ESM.pdf [file 41467_2024_53636_MOESM3_ESM.pdf]

## **Description of Additional Supplementary Files**

File Name: Supplementary Data 1

Description: Filtered MS peptides

File Name: Supplementary Data 2

Description: Oligonucleotide sequences

File Name: Supplementary Movie 1

Description: DDX3X catalytic cycle
